# Supplementary material
Source: PubMed Central journal article supplement (PMC4427906)

# THE LANCET

## **Supplementary appendix**

This appendix formed part of the original submission and has been peer reviewed. We post it as supplied by the authors.

Supplement to: Schröder FH, Hugosson J, Roobol MJ, et al for the ERSPC Investigators. Screening and prostate cancer mortality: results of the European Randomised Study of Screening for Prostate Cancer (ERSPC) at 13 years of follow-up. *Lancet* 2014; published online Aug 7. [http://dx.doi.org/10.1016/S0140-6736\(14\)60525-0](http://dx.doi.org/10.1016/S0140-6736(14)60525-0).

## Web extra material

### Appendix 1 – Acknowledgements

The following people are being acknowledged for their contribution to the ERSPC study.

#### *The Netherlands:*

Erasmus Medical Centre, Departments of Urology, Clinical Chemistry, Pathology, Public Health and statistics Netherlands (CBS)

Dr. W.J. Kirkels, urologist; COD committee

Dr. J.B.W Rietbergen, urologist

Dr. I.W. van der Cruijssen, urologist

Dr. R. Raaijmakers, urologist

Dr. S.H. de Vries, urologist

Dr. S. Roemeling, urologist

Dr. C. Gosselaar, general practitioner

Dr. T. Wolters, urologist in training

Dr. R.C.N. van den Bergh, urologist in training

Dr. P.J. van Leeuwen, urologist in training

Dr. M. Bul, urologist in training

Dr. X. Zhu, urologist in training

Dr. H.A. van Vugt, postdoc

Drs. L.P. Bokhorst, PhD student

Drs. J.W. Salman, PhD student

Drs. L.D.F. Venderbos, PhD student

Drs. G. Yurdakul, urologist

Drs. A. Boeken-Kruger, urologist

Drs. C. Wijburg, urologist

Drs. M. Forouzanfar, urologist

Drs. M. de Boer, urologist

Dr. R. Postma, pathologist

Dr. A.N. Vis, urologist

Dr. R. Hoedemaeker, pathologist

Dr. A. van Leenders, pathologist

Dr. B. Blijenberg, clinical chemistry

Prof. Dr. P.J. van der Maas, epidemiologist

Dr. S. Otto, epidemiologist

Dr. G. Draisma, statistician

Dr. P. Beemsterboer, epidemiologist

Dr. M. Essink-Bot, epidemiologist

Dr. I. Korfage, epidemiologist  
Dr. R. Boer, informatician/mathematician  
Dr. M. Wildhagen, statistician  
Dr. E. Heijnsdijk, epidemiologist  
Drs. W. Merkelbach, COD committee  
Dr. W. Hoekstra, COD committee  
Dr. J. Blom, COD committee  
Drs. RAM Damhuis, epidemiologist, cancer registry  
Drs. A. Reedijk, epidemiologist, cancer registry  
Dr. R. Kranse, statistician, cancer registry  
Mrs. D.W. Roobol, data management  
Mr. W. Roobol, website management  
Mrs. E. van den Berg, administrative support  
Mr. G-J de Zwart, echografist  
Mrs. C.G.A.M. Franken-Raab, data management  
Mrs. M. van Slooten-Midderig, data management  
Mrs. A. Smit, medical assistant  
Mrs. V van der Drift, data management  
Mrs. E. de Bilde, data management  
Mrs. L. Mani, medical assistant  
Mrs. M. Visser-van Dongen, data management  
Mrs. H. Versteeg-Leenheer, data management  
Mrs. B. Zoutendijk, data management  
Mrs. N. Vink, data management  
Mrs. H. van Meurs, echografist  
Mrs. A E. de Bruijn, secretary

*Belgium:*

H. Devriendt Dr.Sc, director, Provinciale Institute Hygiene  
G. Thijs, Data Manager, Provinciale Institute Hygiene  
A. Hermans, Data Manager, Provinciale Institute Hygiene  
K. D'Hooge, Data Manager, Provinciale Institute Hygiene  
Dr. H. Neels, lab Biochemistry, ZNA Antwerp City Hospitals  
Dr. A. Wauters, lab Biochemistry, ZNA Antwerp City Hospitals  
Dr. I. Neetens, lab Pathology, ZNA Antwerp City Hospitals  
Dr. M. Kockx, lab pathology, ZNA Antwerp City Hospitals  
Prof. F. Keuppens, University Hospital Brussels Urology  
Dr. J. Braeckman, University Hospital Brussels Urology  
Dr. F. Govaerts, General Practice Associations, WVVH, UHAK, DOMUS, HAVAC

Dr. B. Spinnewijn, General Practice Associations, WVVH, UHAK, DOMUS, HAVAC  
Dr. M. Van Hoey, General Practice Associations, WVVH, UHAK, DOMUS, HAVAC  
Dr. T. Putzeys, General Practice Associations, WVVH, UHAK, DOMUS, HAVAC  
M. De Coninck, chair, Oncologic Centre Antwerp  
B. Dourcy-Belle-Rose, Coordinator, Oncologic Centre Antwerp  
A. Vancauwenbergh, Secretary, Oncologic Centre Antwerp  
Prof. J.W. Coebergh, COD committee  
Prof. H. Verhaegen, COD committee  
Dr. Van Vliet, COD committee  
Dr. B. Standaert  
Mr. L. Van Herck

*Sweden:*

Maria Nyberg, study nurse  
Svante Bergdahl, Urologist  
Pär Lodding, Urologist  
Ali Khatami, Urologist, former PhD-student  
Johan Stranne, Urologist  
Helén Ahlgren, data manager, study secretary  
Gun-Britt Eriksson, Laboratory technician  
Mona Hassan Al-Battat, Laboratory technician  
AnnaPeri Erlandsson, Laboratory technician  
Charlotte Becker, MD, PhD, Clinical chemistry  
Sigrid Carlsson, MD, PhD, Postdoc  
Anna Grenabo, MD, PhD-student  
Rebecka Godtman, MD, PhD-student  
Silas Pettersson, COD committee  
Eberhard Varenhorst, COD committee  
Bo-Johan Norlén, COD committee  
Björn Zackrisson, Urologist, former PhD-student  
Erik Holmberg, Statistician and database manager  
Roland Frösing, Urologist  
Erik Pileblad, Urologist  
Carl-Gustaf Pihl, pathologist, pathology committee

*Finland:*

Marita Laurila, pathologist, pathology committee, Dept. of Pathology, Centre for Laboratory Medicine, Tampere University Hospital, Tampere, Finland  
Jussi Aro, Dept. of Urology, Helsinki University Central Hospital, Helsinki  
Harri Juusela, Helsinki University Central Hospital, Jorvi Hospital, Espoo  
Markus Mildh, Helsinki University Central Hospital, Peijas-Rekola Hospital, Vantaa

Jorma Lahtela, Dept. of Internal Medicine, Tampere University Hospital, Tampere  
Pekka J Karhunen, Dept. of Forensic Medicine and Research Unit of Clinical Chemistry, University of Tampere, Tampere  
Tuukka Mäkinen, Dept. of Urology, Seinäjoki Central Hospital, Seinäjoki  
Antti Rannikko MD, PhD, Department of Urology, Helsinki University Hospital, Helsinki  
Prof. Nea Malila, Finnish Cancer Registry  
Tuomas Kilpeläinen, MD, PhD, Department of Urology, Helsinki University Hospital, Helsinki, School of Health Sciences, University of Tampere and Tampere University Hospital  
Teemu Murtola MD, PhD, School of Medicine, University of Tampere and Department of Urology, Tampere University Hospital  
Professor Sakari Rannikko, MD, PhD, Department of Urology, Helsinki University Hospital, Helsinki  
Professor Mirja Ruutu, MD, PhD, Department of Urology, Helsinki University Hospital, Helsinki  
Matti Ala-Opas, MD, PhD, Department of Urology, Helsinki University Hospital, Helsinki  
Sanna Kuivalainen, research nurse, Finnish Cancer Registry  
Tiina Karhunen, research nurse, Finnish Cancer Registry  
Maarit Leinimaa, research nurse, Department of Clinical Chemistry, Helsinki University Hospital, Helsinki  
Jaana Saarinen, study nurse, Department of Urology, Tampere University Hospital

*Italy:*

Mario Cappellini, COD Committee  
Simonetta Bianchi, COD Committee  
Claudio Lombardi, COD Committee  
Alessandro Bussotti, COD Committee  
Paolo Bastiani, COD Committee  
Simonetta Di Lollo, Pathology Committee

*Co-operators:*

Gianfranco Manneschi, Cancer Research and Prevention Institute (ISPO)  
Emanuele Crocetti, Cancer Research and Prevention Institute (ISPO)  
Rita Bonardi, Cancer Research and Prevention Institute (ISPO)  
Tiziana Rubeca, Cancer Research and Prevention Institute (ISPO)  
Beatrice Detti, AOU Careggi

*Spain:*

Antonio Berenguer. Servicio de Urología. Hospital de Madrid Norte Sanchinarro. Madrid, Spain.  
Jose A. Rodriguez. Instituto Nacional de Estadística. Madrid, Spain.  
Benita Aybar. Instituto Nacional de Estadística. Madrid, Spain.  
Javier C. Angulo. Department of Urology, Hospital Universitario de Getafe, Getafe, Madrid, Spain, Universidad Europea de Madrid, Madrid, Spain.  
Rosario Granados. Department of Pathology, Hospital Universitario de Getafe, Getafe, Madrid, Spain, Universidad Europea de Madrid, Madrid, Spain.

*Switzerland:*

Kantonsspital Aarau, Aarau, Switzerland:

Dr. med. Daniel Seiler, Urologist, Department of Urology

Dr. med. Martin Baumgartner, Urologist, Department of Urology

Dr. med. Marco Randazzo, resident, Department of Urology

† Prof. Dr. Reto Tscholl, previous Chairman of local COD Committee, Professor emeritus, Department of Urology

Mrs. Elsbeth Woodtli, study nurse/ data management, Department of Urology

Mrs. Lydia Schärer, study nurse/ data management, Department of Urology

Dipl. Pharm. Roberto Herklotz, Centre of Laboratory Medicine

Prof. Dr. Bernhard Stamm, Pathologist, histopathological evaluation and pathological review, Professor emeritus, Institute for Pathology

Dr. med. Martin Wernli, Oncologist, care for patients, Department of Oncology and Hematology

Prof. Dr. Stephan Bodis, Radiooncologist, care for patients, Department of Radiooncology

Prof. Dr. Rainer Grobholz, Pathologist, Institute for Pathology

Kantonsspital Baden, Baden:

Dr. med. Kurt Lehmann, Urologist, Department of Urology

Dr. Hans-Ruedi Schmid, Central Laboratory

Aargau Association of Medical Doctors, Baden:

Dr. med. Hans-Ulrich Iselin, General Practitioner, cooperation with general practitioners in Aargau

University Hospital Basel, Basel:

Prof. Dr. Lukas Bubendorf, Review Pathologist, Pathology Committee, Institute for Pathology, Division of Cytology

Prof. Dr. Stephen Wyler, Chairman of local COD Committee, Department of Urology

Department of Medicine, University Hospital Zürich, Zürich:

Prof. Dr. Johann Steurer, Internist, Member of local COD Committee

Group Practice for Pathology, Zürich:

PD Dr. Michael Kurrer, Pathologist, Member of local COD Committee

*France:*

Bernard Malavaud, urologist

François Iborra, urologist

Sandra Malavaud, epidemiologist

Pascale Grosclaude, epidemiologist

Brigitte Tretarre, epidemiologist

Vincent Bataille, data manager

Faiza Bessaoud, data manager

*The United Kingdom:*

Datamanager of the ERSPC central database:

M. Neville

## **Appendix 2 – Grants received per centre**

### *The Netherlands:*

The Dutch Cancer Society (KWF 94-869, 98-1657, 2002-277, 2006-3518, 2010-4800); The Netherlands Organisation for Health Research and Development (ZonMW-002822820, 22000106, 50-50110-98-311, 62300035).

### *Belgium:*

Europe against Cancer, Flemish Ministry of Welfare, Public Health and Family, Province and City of Antwerp, Public Centre for Social Welfare Antwerp

### *Sweden:*

Abbott Pharmaceuticals, Sweden, Af Jochnick's foundation, Catarina and Sven Hagstroms family foundation, Gunvor and Ivan Svensson's foundation, Johanniterorden, King Gustav V Jubilee Clinic Cancer Research Foundation, Sahlgrenska University Hospital, Schering Plough, Sweden, Swedish Cancer Society, Wallac Oy, Turku, Finland. Dr. Lilja moved to the US during the course of the study. He requests the following acknowledgements for his personal contribution: National Cancer Institute grants: R01CA160816 and P50-CA92629; Swedish Cancer Society 11-0624; The Sidney Kimmel centre for prostate and Urological cancers; David H. Koch through the Prostate Cancer Foundation; the National Institute for Health Research (NIHR) Oxford Biomedical Research Centre Program; Fundacion Federico SA; and FiDiPro grant support from TEKES, Finland. Conflicts of interest: Dr. Hans Lilja holds patents for free PSA, intact PSA and hK2 assays.

### *Finland:*

Academy of Finland (Grant no. 123054, 261205), Competitive Research Funding of the Tampere University Hospital (Grant no. 9K131, 9L103, 9M102, 9N078 and 9P053), Nordic Cancer Union, The Cancer Society of Finland

### *Italy:*

Italian League for the Fight against Cancer - LILT Lega Italiana per la Lotta contro i Tumori, Italian Association for Cancer Research - AIRC Associazione Italiana Ricerca sul Cancro, National Research Council - CNR Consiglio Nazionale delle Ricerche, Tuscany Region - Regione Toscana

### *Spain:*

The Spanish "Fondo de Investigación Sanitaria": 96/0248, 99/0245, 02/0732, 06/0831.

### *Switzerland:*

The Horten Foundation, Aargau Cancer League, Swiss Cancer League (Grant Nr KFS 787-2-1999 and 01112-02-2001), Health Department of Canton Aargau, Prostate Cancer Research Foundation, Baugarten Foundation and the Messerli Foundation.

### *France:*

Institut National du Cancer convention 12-2008 Convention : 07/3D1616/SPC-111-13/NG-NC Appel à projets 2007 : Santé publique et Cancers  
Ligue Nationale Contre le cancer PROJET N° PRE08/AV – CONV. DRC 2009/119

### *International coordination:*

European Union Grants SOC 95 35109, SOC 96 201869 05F022, SOC 97 201329, SOC 98 32241, the 6th Framework Program of the EU: PMark:LSHC-CT-2004-503011;



*Unconditional grants:*  
Beckman-Coulter-Hybritech Inc

### **Appendix 3: Pathology review**

The Pathology Committee of ERSPC.

Composition and mandate: the Pathology Committee of the ERSPC is composed of the reference pathologists representing one of each ERSPC screening center (see below for list of members). Their mandate is to enhance the application of the guidelines on reporting of prostate biopsies of participants of the screening arm of the ERSPC trial (see documentation 1, below).

Objectives of the Pathology Committee:

- 1) To guard the uniformity in tissue processing and nomenclature of diagnosis and staging terms in the histopathological reporting of sextant needle biopsies taken from participants of the screening arm of the ERSPC trial.
- 2) To enhance the quality of histopathological diagnosis of prostate biopsies.
- 3) To reduce the inter-observer variation among screening centers particularly with regard to Gleason score of prostatic adenocarcinomas.

Duties of the members of the Pathology Committee

- 1) Supervision of the pathology reporting of the prostate biopsies obtained from participants in the ERSPC screening centers. In most centers the reference pathologists reviewed all needle biopsies of patients with a diagnosis of adenocarcinoma or a lesion suspicious for carcinoma. They further provide low threshold (intradepartmental) inter-collegial consultations for prostate biopsy diagnostics. In a few centers the reference pathologists examines and reports all prostate biopsies of the participants of the screening arm of the ERSPC trial.
- 2) Attendance of the annual Pathology Committee used for discussion of issues regarding quality assurance, uniform reporting and Gleason scoring.
- 3) Participation in slide reviews and educational sessions, designed for reduction of inter-observer variation of Gleason score and diagnosis.

Actions to reduce inter-observer variation for Gleason score on prostate biopsies:

- 1) Educational sessions using multiheader microscope.
- 2) Inter-observer studies using virtual microscopy (see Helin H, Lundin M, Lundin J, Martikainen P, Tammela T, Helin H, Van der Kwast TH. Web-based virtual microscopy in teaching and standardizing Gleason grading. *Hum Pathol.* 2005; 36: 381-386).
- 3) On site review of prostate biopsies of the Finnish ERSPC trial by two members of the pathology committee (Van der Kwast, Hoedemaeker) in order to improve grading consistency (see document 2 for details).

Documents / publications produced by the Pathology Committee of the ERSPC:

1. Guideline documents accepted at the Consensus Workshop on Prostatic Screening held in Antwerp (see Denis L, Murphy GP, Schröder FH. *Cancer* 1995; 75: 1178-1207): van der Kwast TH, Lopes C, Santonja C, Pihl C-G, Martikainen P, Di Lollo S, Bubendorf L, Hoedemaeker RF, and members of the pathology committee of the ERSPC. Guidelines for processing and reporting of prostatic needle biopsies. *J. Clin Path* 2003; 56:336-40.
2. Van der Kwast TH, Roobol MJ, Wildhagen MF, Martikainen PM, Määttänen L, Pihl C-G, Santonja C, Bubendorf L, Neetens I, Di Lollo S and Hoedemaeker RF. Consistency of prostate cancer grading results in screened populations across Europe. *BJUI* 2003; 92 (S2): 88-91.
3. Van der Kwast TH, Lopes C, Martikainen PM, Pihl CG, Santonja C, Neetens I, Di Lollo S, Hoedemaeker RF. Report of the Pathology Committee: false-positive and false-negative diagnoses of prostate cancer. *BJU Int.* 2003 Dec;92 Suppl 2:62-5.
4. Van der Kwast TH, Ciatto S, Martikainen PM, Hoedemaeker R, Laurila M, Pihl C-G, Hugosson J, Neetens I, Nelen V, Di Lollo S, Roobol MJ, Maattanen L, Santonja C, Moss S and Schröder FH. Detection rates of high-grade prostate cancer during subsequent screening visits. Results of the European Randomized Screening Study for Prostate Cancer. *Int J Cancer* 2006; 118: 2538-2542.

Members of the Pathology Committee

Th. Van der Kwast ERSPC section Rotterdam (chair)

G.J. van Leenders ERSPC section Rotterdam (2004-)

R.F. Hoedemaeker ERSPC section Rotterdam (1997-2002)

C-G. Pihl ERSPC section Goteborg

P.M. Martikainen ERSPC section Tampere/Helsinki

M. Laurila ERSPC section Tampere/Helsinki

L. Bubendorf ERSPC section Aarau

C. Santonja ERSPC section Getafe ( -2007)

I. Neetens ERSPC section Antwerp

S. DiLollo ERSPC section Florence

C. Mazerolles ERSPC section Toulouse

#### Appendix 4 – Medical ethical approvals per centre

| The Netherlands                   |               |               |
|-----------------------------------|---------------|---------------|
| Institution                       | Date of issue | Record number |
| Health Council of the Netherlands | 29-03-1996    | 1996/02       |
| Health Council of the Netherlands | 15-12-2000    | 2000/05       |
| Health Council of the Netherlands | 24-07-2007    | 2007/03       |

  

| Belgium                                                                                |               |                    |
|----------------------------------------------------------------------------------------|---------------|--------------------|
| Institution                                                                            | Date of issue | Record number      |
| Ministry of the Flemish Community, the minister of welfare, national health and family | 1999          | ZG/PET/ERSPC 06031 |
| Ministry of the Flemish Community, the minister of welfare, national health and family | 2002          | ZG/PET/ERSPC 06031 |
| Ministry of the Flemish Community, the minister of welfare, national health and family | 2004          | ZG/PET/ERSPC 06031 |

  

| Sweden                 |               |               |
|------------------------|---------------|---------------|
| Institution            | Date of issue | Record number |
| University of Goteborg | 02-02-1994    | 463-93        |
| University of Goteborg | 31-05-1995    | 180-95        |

  

| Finland                                                   |               |                       |
|-----------------------------------------------------------|---------------|-----------------------|
| Institution                                               | Date of issue | Record number         |
| Population Register Centre                                | 15-12-1995    | 1058/40/95            |
| City of Helsinki, Office for Health Care                  | 04-06-1996    | 6/96                  |
| City of Vantaa                                            | 02-02-1996    | 6/96                  |
| Ministry of Social Affairs and Health in Finland          | 01-10-1999    | 51/07/1999            |
| City of Tampere                                           | 13-12-2000    | 7649/403/2000         |
| Hospital District of Helsinki and Uusimaa                 | 29-01-2001    | 55/2000               |
| Helsinki University Hospital                              | 28-05-2001    | 249/2001              |
| The National Authority for Medico legal Affairs           | 27-02-2002    | 601/32/300/02         |
| Statistics Finland                                        | 19-12-2003    | TK-53-1610-03         |
| National Institute of Health and Welfare                  | 2010          | THL/1752/5.05.00/2010 |
| Pirkanmaa Hospital District (Tampere University Hospital) | 07-12-2010    | R10617/13/2010        |

  

| Italy                                                    |               |               |
|----------------------------------------------------------|---------------|---------------|
| Institution                                              | Date of issue | Record number |
| Centro per lo Studio e la Prevenzione Oncologica Firenze | 03-06-1996    | 1996/06/03    |

  

| Spain                            |               |               |
|----------------------------------|---------------|---------------|
| Institution                      | Date of issue | Record number |
| Hospital Universitario de Getafe | 22-03-2006    | Acta -3/06    |

|                     |               |               |
|---------------------|---------------|---------------|
| Switzerland         |               |               |
| Institution         | Date of issue | Record number |
| Kantonsspital Aarau | 09-09-1998    | 1998-09-09/RK |

|                                                                                               |               |               |
|-----------------------------------------------------------------------------------------------|---------------|---------------|
| France                                                                                        |               |               |
| Institution                                                                                   | Date of issue | Record number |
| Le Comite Consultatif de Protection des Personnes dans la Recherche Biomedicale de Toulouse I | 17-07-2000    |               |

**Appendix Table 1: ERSPC – Randomization, participants and results of screening per center (all ages, cut-off date December 31- 2010, data truncated at 13 years of follow-up.**

| <b>Period of randomization</b>                               | <b>Netherlands<br/>Nov 1993 –<br/>March 2000</b> | <b>Belgium<br/>June<br/>1991- Dec<br/>2003</b> | <b>Sweden<br/>31-Dec-04</b> | <b>Finland<br/>Jan 1996-<br/>Jan 1999</b> | <b>Italy<br/>Oct<br/>1996 –<br/>Oct<br/>2000</b> | <b>Spain<br/>Feb<br/>1996 –<br/>June<br/>1999</b> | <b>Switzerland<br/>Sep 1998 -<br/>Aug-03</b> | <b>Total<br/>Excluding<br/>France</b> | <b>Herault<br/>June 2003<br/>– Mar<br/>2005</b> | <b>Tarn<br/>Dec 2000<br/>– June<br/>2004</b> | <b>Total</b> |
|--------------------------------------------------------------|--------------------------------------------------|------------------------------------------------|-----------------------------|-------------------------------------------|--------------------------------------------------|---------------------------------------------------|----------------------------------------------|---------------------------------------|-------------------------------------------------|----------------------------------------------|--------------|
| <b>Median age at randomisation (yrs)</b>                     | 63.2                                             | 64.1                                           | 56.4                        | 58.7                                      | 62.0                                             | 56.6                                              | 61.0                                         | 60.1                                  | 62.6                                            | 61.7                                         | 61.2         |
| <b>Randomized – N</b>                                        | 42,368                                           | 10,359                                         | 19,911                      | 80,379                                    | 14,971                                           | 3,702                                             | 10,309                                       | 181,999                               | 62039                                           | 22473                                        | 266,511      |
| - screening                                                  | 21,206                                           | 5,188                                          | 9,957                       | 31,970                                    | 7,497                                            | 1,840                                             | 5,158                                        | 82,816                                | 31,024                                          | 11,423                                       | 125,263      |
| - control                                                    | 50.1%                                            | 50.1%                                          | 50.0%                       | 39.8%                                     | 50.1%                                            | 49.7%                                             | 50.0%                                        | 45.5%                                 | 50.0%                                           | 50.8%                                        | 47.0%        |
|                                                              | 21,162                                           | 5,171                                          | 9,954                       | 48,409                                    | 7,474                                            | 1,862                                             | 5,151                                        | 99,183                                | 31,015                                          | 11,050                                       | 141,248      |
|                                                              | 49.9%                                            | 49.9%                                          | 50.0%                       | 60.2%                                     | 49.9%                                            | 50.3%                                             | 50.0%                                        | 54.5%                                 | 50.0%                                           | 49.2%                                        | 53.0%        |
| Screened at least once N                                     | 19970                                            | 4682                                           | 7558                        | 23771                                     | 5896                                             | 1840                                              | 5015                                         | 68,732                                | 7587                                            | 4352                                         | 80,671       |
| (%)                                                          | ( 94.2)                                          | ( 90.2)                                        | ( 75.9)                     | ( 74.4)                                   | ( 78.6)                                          | ( 100.0)                                          | ( 97.2)                                      | ( 83.0)                               | ( 24.5)                                         | ( 38.1)                                      | ( 64.4)      |
| Screen tests done – N                                        | 43491                                            | 7280                                           | 31152                       | 52142                                     | 13022                                            | 3317                                              | 12561                                        | 162,965                               | 7587                                            | 5646                                         | 176,198      |
| Mean no of screens / man screened                            | 2.2                                              | 1.6                                            | 4.1                         | 2.2                                       | 2.2                                              | 1.8                                               | 2.5                                          | 2.4                                   | 1.0                                             | 1.3                                          | 2.2          |
| Positive tests – N                                           | 10671                                            | 1213                                           | 5042                        | 5925                                      | 1491                                             | 543                                               | 2678                                         | 27,563                                | 1183                                            | 847                                          | 29,593       |
| (%)                                                          | ( 24.5)                                          | ( 16.7)                                        | ( 16.2)                     | ( 11.4)                                   | ( 11.4)                                          | ( 16.4)                                           | ( 21.3)                                      | ( 16.9)                               | ( 15.6)                                         | ( 15.0)                                      | ( 16.8)      |
| Biopsies – N                                                 | 9499                                             | 849                                            | 4393                        | 5404                                      | 923                                              | 394                                               | 2088                                         | 23,550                                | 342                                             | 430                                          | 24,322       |
| (% of screen positive)                                       | ( 89.0)                                          | ( 70.0)                                        | ( 87.1)                     | ( 91.2)                                   | ( 61.9)                                          | ( 72.6)                                           | ( 78.0)                                      | ( 85.4)                               | ( 28.9)                                         | ( 50.8)                                      | ( 82.2)      |
| <b>Prostate cancers</b>                                      |                                                  |                                                |                             |                                           |                                                  |                                                   |                                              |                                       |                                                 |                                              |              |
| Screening cohort total – N                                   | 2643                                             | 500                                            | 1082                        | 3018                                      | 417                                              | 115                                               | 596                                          | 8371                                  | 1320                                            | 573                                          | 10264        |
| Screen detected N                                            | 2120                                             | 214                                            | 861                         | 1631                                      | 202                                              | 78                                                | 447                                          | 5553                                  | 174                                             | 123                                          | 5850         |
| Interval and Non attender N                                  | 523                                              | 286                                            | 221                         | 1387                                      | 215                                              | 37                                                | 149                                          | 2818                                  | 1146                                            | 450                                          | 4414         |
| PPV (S det cancers/biopsy, %)                                | 22.3                                             | 25.2                                           | 19.6                        | 30.2                                      | 21.9                                             | 19.8                                              | 21.4                                         | 23.6                                  | 50.9                                            | 28.6                                         | 24.1         |
| Cumulative incidence (total cancers / all rand. To S arm, %) | 12.5                                             | 9.6                                            | 10.9                        | 9.4                                       | 5.6                                              | 6.3                                               | 11.6                                         | 10.1                                  | 4.3                                             | 5.0                                          | 8.2          |
| <b>Prostate cancers</b>                                      |                                                  |                                                |                             |                                           |                                                  |                                                   |                                              |                                       |                                                 |                                              |              |
| Control group – N                                            | 1353                                             | 414                                            | 654                         | 3609                                      | 301                                              | 66                                                | 310                                          | 6707                                  | 1204                                            | 522                                          | 8433         |
| Cumulative incidence (%)                                     | ( 6.4)                                           | ( 8.0)                                         | ( 6.6)                      | ( 7.5)                                    | ( 4.0)                                           | ( 3.5)                                            | ( 6.0)                                       | ( 6.8)                                | ( 3.9)                                          | ( 4.7)                                       | ( 6.0)       |
| <b>Mean Follow up ( years)</b>                               | 11.2 (3.1)                                       | 10.7 (3.3)                                     | 12.0 (2.7)                  | 11.4 (3.0)                                | 11.3                                             | 12.0                                              | 9.8 (2.0)                                    | 11.3 (2.9)                            | 6.2 (1.1)                                       | 7.3 (1.5)                                    | 9.8 (3.4)    |
| <b>Median follow-up (years)</b>                              | 12.8 (1.8)                                       | 13.0 (4.2)                                     | 13.0 (0)                    | 13.0 (1.0)                                | 12.6                                             | 12.6                                              | 10.2 (2.5)                                   | 13.0 (1.8)                            | 6.4 (0.6)                                       | 7.5 (0)                                      | 11.4 (6.4)   |

**Appendix tables 2a and 2b: Prostate cancer incidence and mortality in the intervention and control arms during 3 time periods – All ages, France excluded except for Years 1-9**

a) Prostate cancer incidence

|                        | Intervention            |              |                               | Control                 |              |                               | Rate Ratio <sup>1</sup><br>(95% CI) | Rate difference<br>per 1000 persons year<br>(95% CI) | Rate difference<br>per 1000 men |
|------------------------|-------------------------|--------------|-------------------------------|-------------------------|--------------|-------------------------------|-------------------------------------|------------------------------------------------------|---------------------------------|
|                        | Prostate<br>Cancer<br>N | Person years | Rate per 1000<br>person years | Prostate<br>Cancer<br>N | Person years | Rate per 1000<br>person years |                                     |                                                      |                                 |
| Year 1-9 inc<br>France | 8777                    | 929592       | 9.44                          | 6258                    | 1080759      | 5.79                          | 1.64 (1.59-1.70)                    | 3.69 (3.44-3.94)                                     | 26.5                            |
| Years 1-9              | 6884                    | 663471       | 10.38                         | 4533                    | 816211       | 5.55                          | 1.91 (1.83- 1.98)                   | 4.92 (4.62-5.22)                                     | 38.3                            |
| Years 1-11             | 7643                    | 784291       | 9.75                          | 5779                    | 967490       | 5.97                          | 1.66 (1.60 - 1.73)                  | 3.88 (3.60 -4.15)                                    | 35.2                            |
| Years 1-13             | 8371                    | 879450       | 9.52                          | 6707                    | 1086705      | 6.17                          | 1.57 (1.52 – 1.63)                  | 3.46 (3.20 – 3.72)                                   | 34.9                            |

<sup>1</sup> Adjusted by centre

| B: Prostate cancer mortality (France included years 1 – 9) |                                   |              |                               |                                   |              |                                     |                                     |                                                      |                                       |                                     |
|------------------------------------------------------------|-----------------------------------|--------------|-------------------------------|-----------------------------------|--------------|-------------------------------------|-------------------------------------|------------------------------------------------------|---------------------------------------|-------------------------------------|
|                                                            | Intervention                      |              |                               | Control                           |              |                                     | Rate Ratio <sup>1</sup><br>(95% CI) | Rate difference<br>per 1000 persons year<br>(95% CI) | Rate<br>difference<br>per 1000<br>men | Adjusted rate ratio in<br>attenders |
|                                                            | Prostate<br>Cancer<br>deaths<br>N | Person years | Rate per 1000<br>person years | Prostate<br>Cancer<br>deaths<br>N | Person years | Rate per<br>1000<br>person<br>years |                                     |                                                      |                                       |                                     |
| Years 1-9                                                  | 226                               | 696395       | 0.32                          | 313                               | 832917       | 0.38                                | 0.86 (0.72-1.03) p=0.10             | -0.05 (-0.11 - +0.01)                                | -0.43                                 |                                     |
| Years 1-11                                                 | 314                               | 829341       | 0.38                          | 465                               | 992742       | 0.47                                | 0.80<br>(0.69 – 0.93) P=0.004       | -0.09 (-0.15 - -0.03)                                | -0.92                                 | 0.75 (0.62 -0.91)                   |
| Years 1-13                                                 | 427                               | 935185       | 0.46                          | 610                               | 1120432      | 0.54                                | 0.83<br>(0.73- 0.94) p = 0.004      | -0.09 (-0.16 - -0.03)                                | -1.05                                 | 0.78 (0.66-0.92)                    |

1 Adjusted by centre



**Appendix table 3: Numbers needed to be invited (NNI) and numbers needed to be detected (NND)**

**Follow-up periods 11 and 13 years, all ages, France excluded.**

|              | 11 years of follow-up |     | 13 years of follow-up |     |
|--------------|-----------------------|-----|-----------------------|-----|
|              | NNI (95% CI)          | NND | NNI (95% CI)          | NND |
| Excl. France | 1091 (647 - 3462)     | 37  | 953 (563 – 3093)      | 33  |

**Appendix table 4: Prostate cancer mortality for individual centres – core age group, FU truncated at 13 years.**

| Center      | Intervention arm |              |                        | Control arm |              |                     | Rate ratio<br>(95% CI) |
|-------------|------------------|--------------|------------------------|-------------|--------------|---------------------|------------------------|
|             | Deaths           | Person years | Rate p.1000<br>p.years | Deaths      | Person years | Rate p.1000 p.years |                        |
| Netherlands | 85               | 199958       | 0.43                   | 126         | 199165       | 0.63                | 0.67 (0.51 – 0.88)     |
| Belgium     | 18               | 46939        | 0.38                   | 23          | 45932        | 0.50                | 0.77 (0.41 – 1.42)     |
| Sweden      | 38               | 69152        | 0.55                   | 62          | 69498        | 0.89                | 0.62 (0.41 – 0.92)     |
| Finland     | 170              | 365529       | 0.47                   | 284         | 553046       | 0.51                | 0.91 (0.75 – 1.10)     |
| Italy       | 26               | 82457        | 0.32                   | 32          | 81715        | 0.39                | 0.81 (0.48– 1.35)      |
| Spain       | 2                | 12594        | 0.16                   | 4           | 13583        | 0.29                | 0.54 (0.10 – 2.94)     |
| Switzerland | 16               | 48388        | 0.33                   | 14          | 48253        | 0.29                | 1.14 (0.56 – 2.33)     |

The result of the heterogeneity test is  $\chi^2_6 = 5.95$  (  $p = 0.43$ ).

**Appendix table 5: T1c cancers, core age group, excluding France (n = number of T1c cancers)**

|                             | Year     |          |          |          |
|-----------------------------|----------|----------|----------|----------|
| Arm                         | 1        | 4        | 8        | 12       |
| Intervention (n)            | 733      | 136      | 186      | 117      |
| Follow-up (years)           | 71089.84 | 67121.73 | 60179.52 | 47279.88 |
| Rate per 1.000 person years | 10.31    | 2.03     | 3.09     | 2.47     |
|                             |          |          |          |          |
| Control (n)                 | 75       | 159      | 282      | 218      |
| Follow-up (years)           | 88282.97 | 83738.10 | 76035.44 | 60903.35 |
| Rate per 1.000 person years | 0.85     | 1.90     | 3.71     | 3.58     |
|                             |          |          |          |          |

**Appendix Figure 1: Flow diagram of the ERSPC trial; all ages. Excluding France**

**Appendix Figure 2: Nelson Aalen estimates of cumulative PCa mortality: all ages**

Figure 1

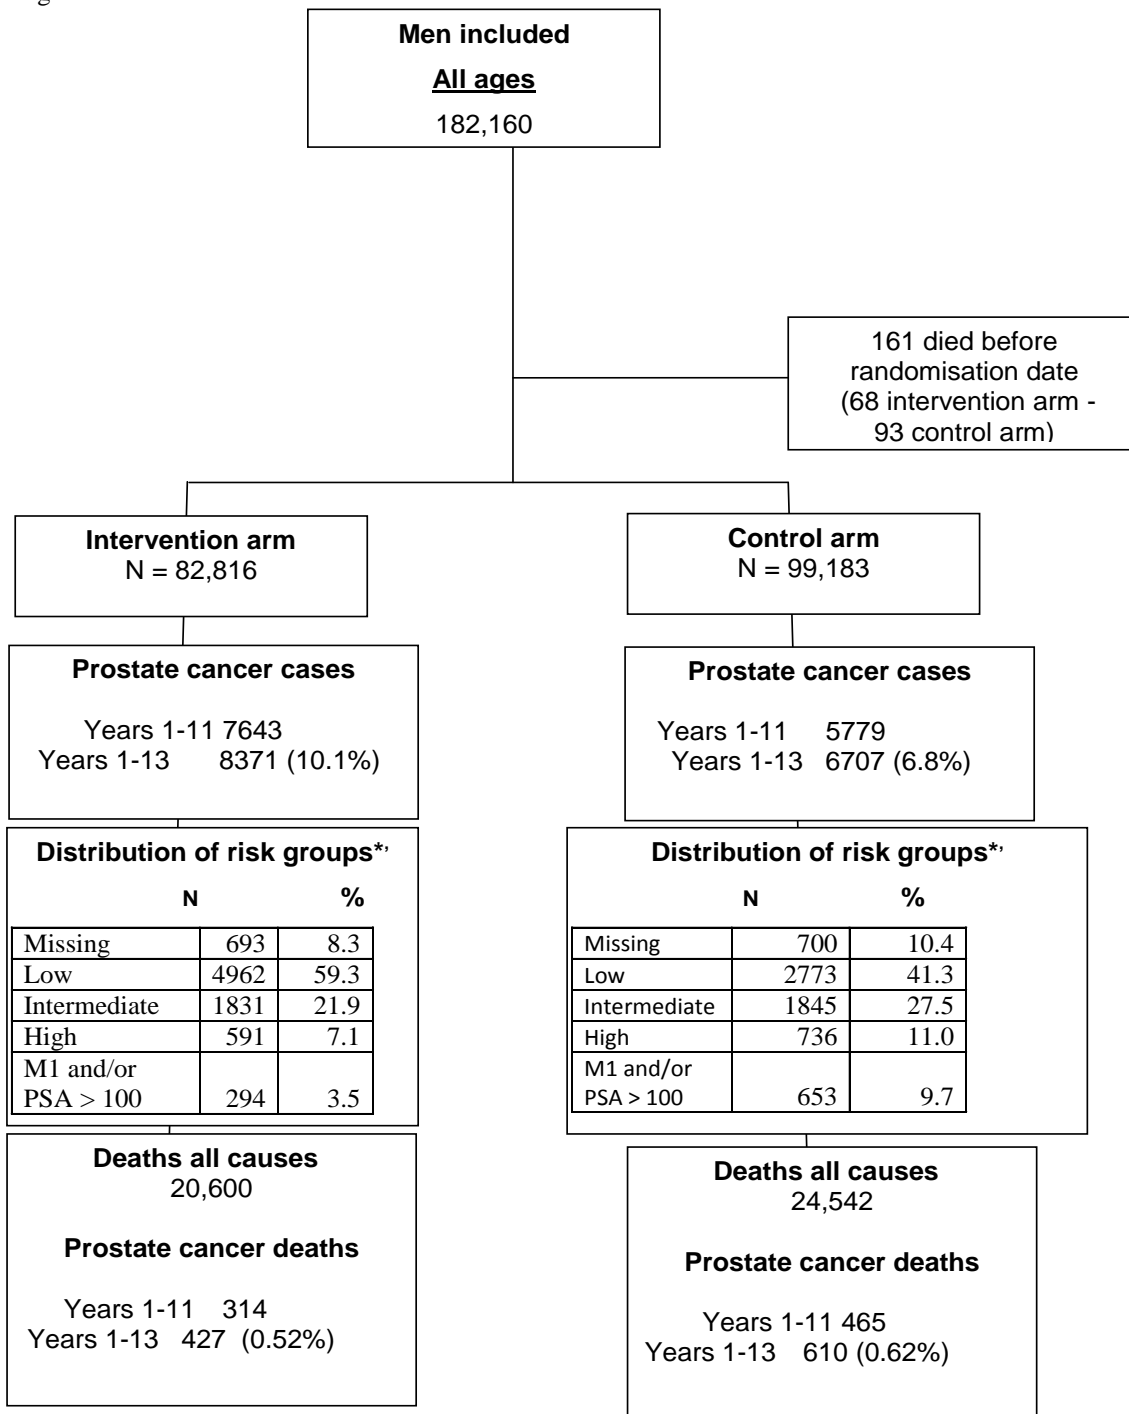

\* Low risk= T1,T2 with Gleason score (GS) <= 6; Intermediate risk = T1,T2 with GS 7 and T3 with GS <=7; High risk = T1,T2,T3 with GS 8-10 and T4 with any GS; M1 and/or PSA > 100 = any T stage or GS with M1 and/or PSA > 100

Figure 2

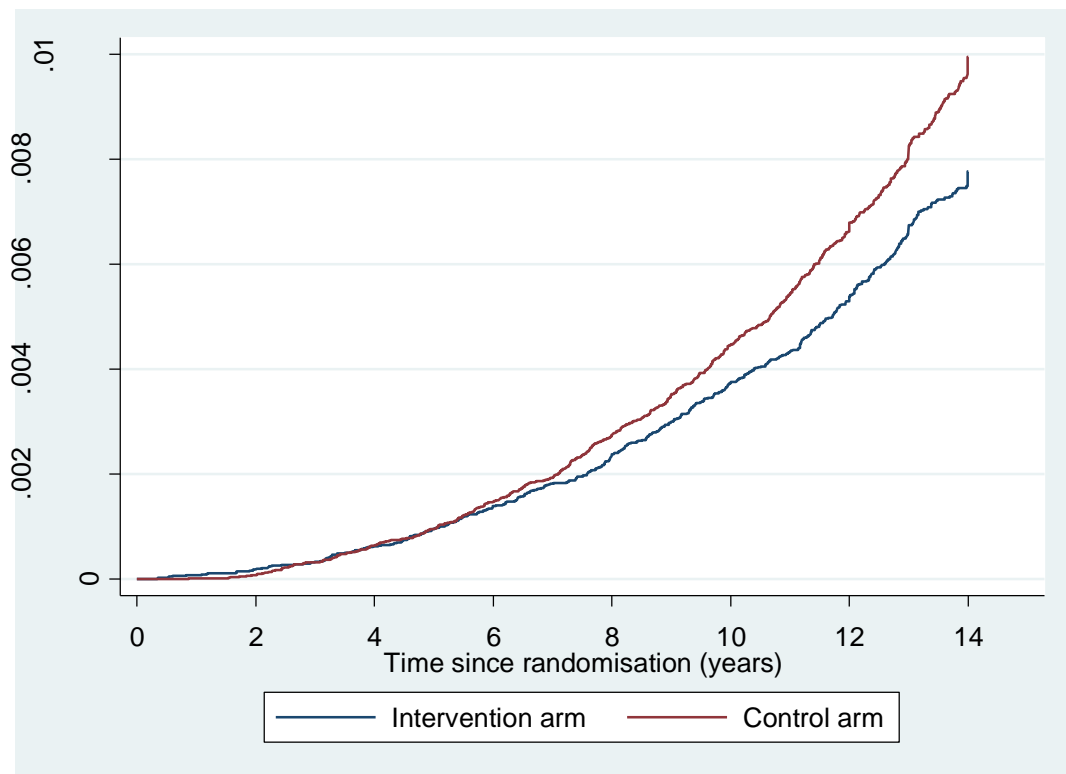

Supplement: NIHMS683906-supplement-01.pdf [file NIHMS683906-supplement-01.pdf]
